# Supplementary material for: Combined Metabolome and Transcriptome Analysis Highlights the Host’s Influence on Cistanche deserticola Metabolite Accumulation
Source: MDPI journal article supplement (doi:10.3390/ijms24097968), 2023-04-27
Supplement: s1 [file s1]

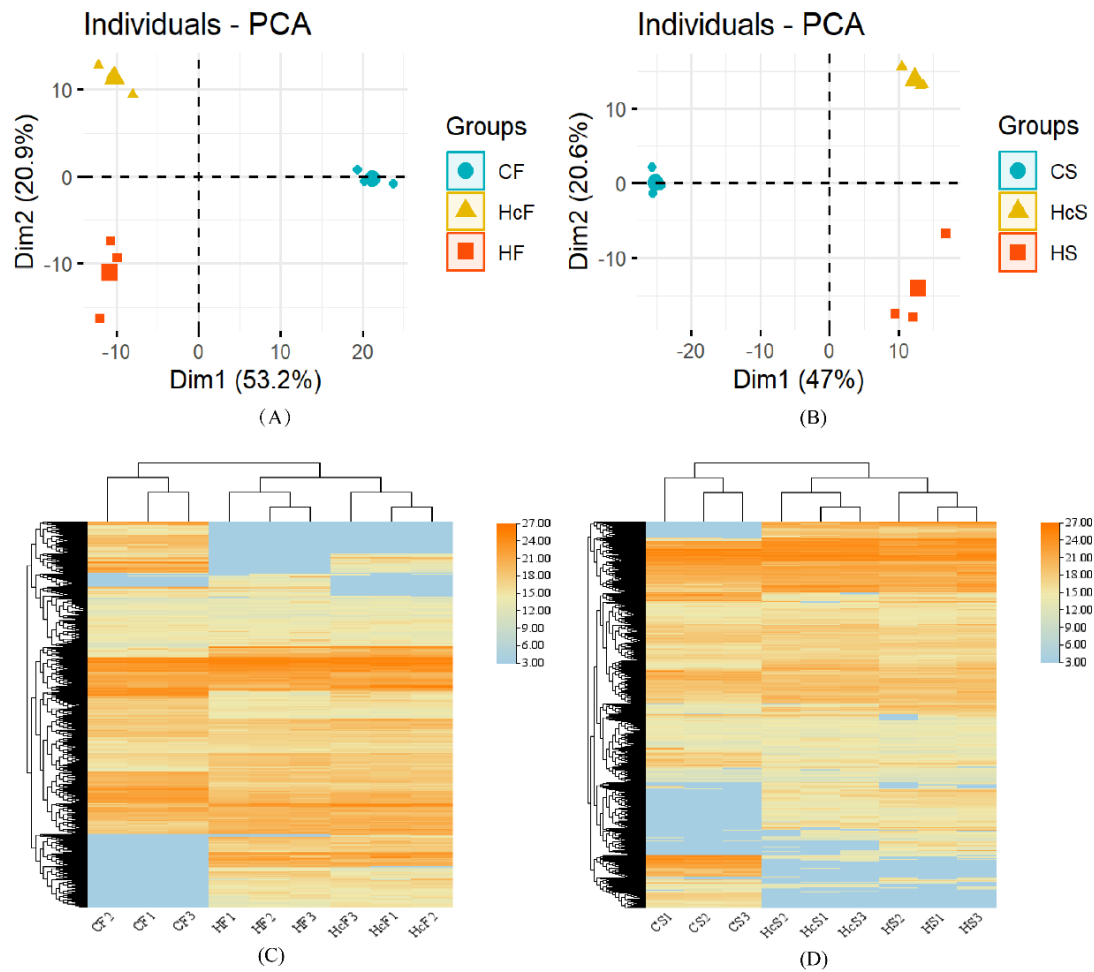

**Supplement Figure S1.** Clustering analysis based on metabolomic data. (A) Principal component analysis based on metabolomic data of CF, HcF and HF samples. (B) Principal component analysis based on metabolomic data of CS, HcS and HS samples. (C) Hierarchical cluster analysis based on metabolomic data of CF, HcF and HF samples. (D) Hierarchical cluster analysis based on metabolomic data of CS, HcS and HS samples.

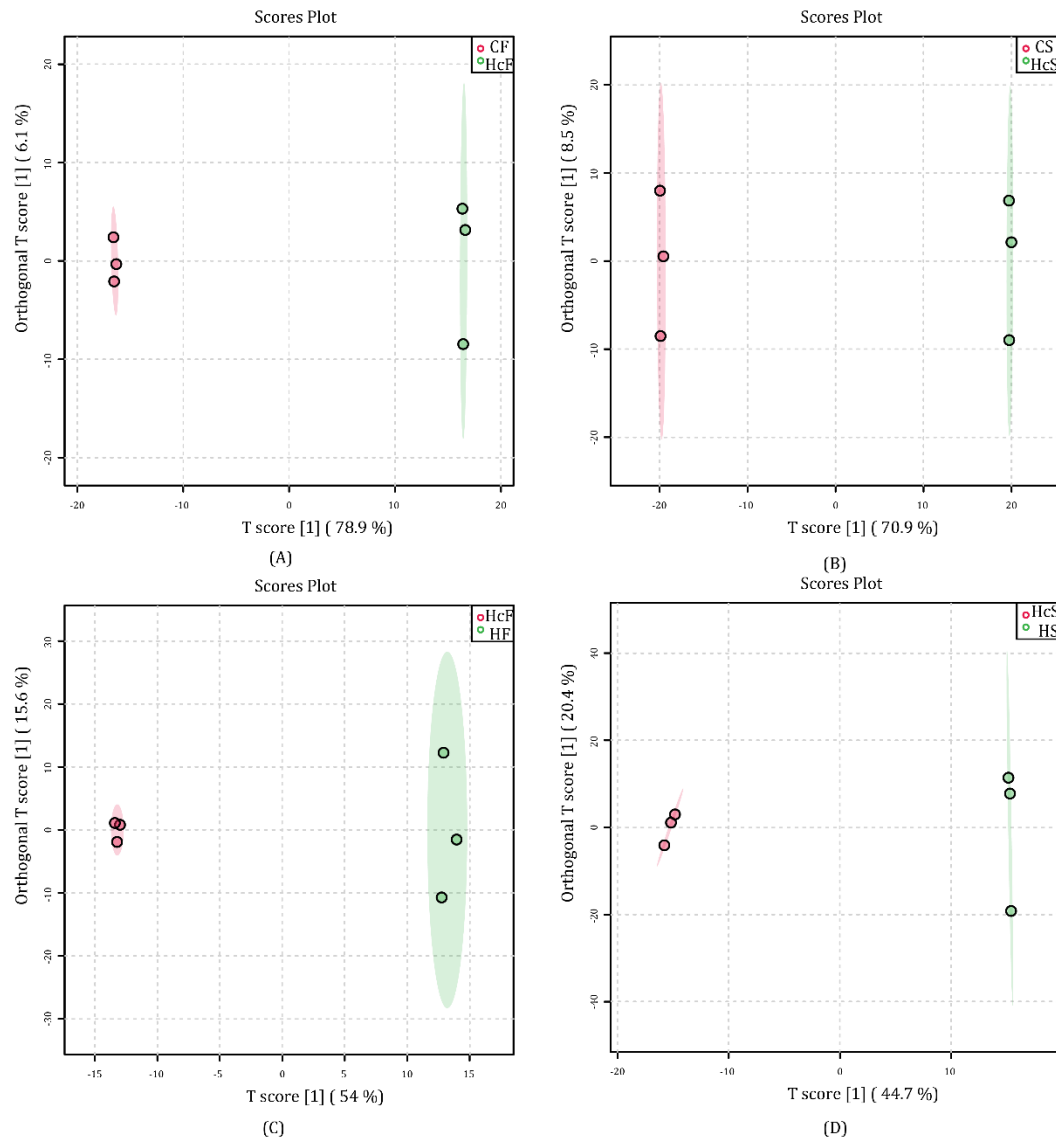

**Supplement Figure S2.** Orthogonal partial least squares discrimination analysis (OPLS-DA) based on metabolomic data. (A) OPLS-DA graph of CF-vs.-HcF group. (B) OPLS-DA graph of CS-vs.-HcS group. (C) OPLS-DA graph of HcF-vs.-HF group. (D) OPLS-DA graph of CS-vs.-HcS group.

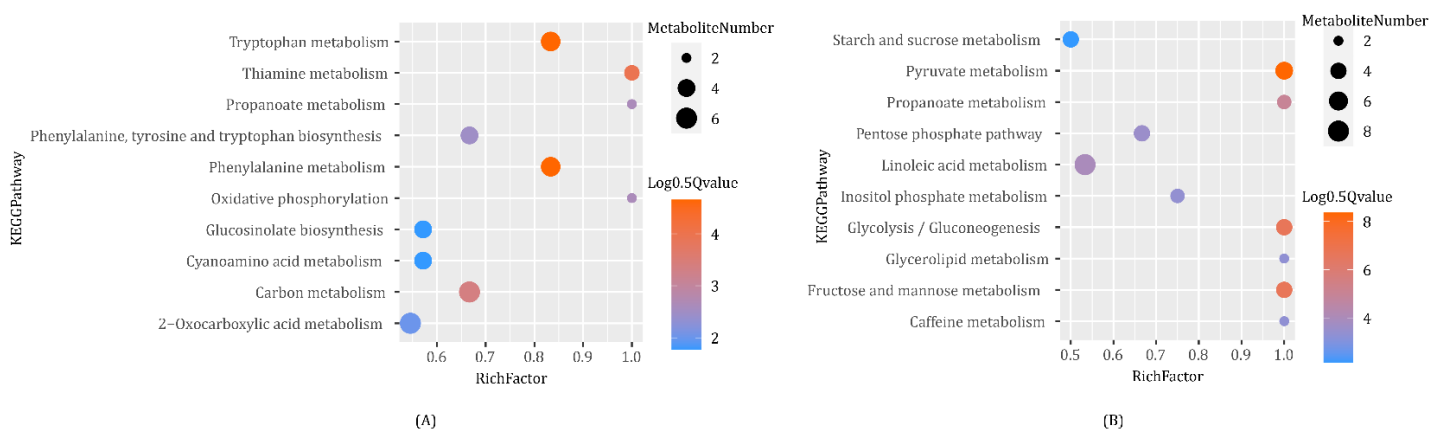

**Supplement Figure S3.** The bubble plots showed KEGG enrichment analysis results using *H. ammodendron* DAMs affected by *C. deserticola* parasitism. The bubble's color indicated q value and its size represented the number of DAMs enriched. (A) The bubble plot of top 10 KEGG pathways to which HcF-vs.-HF DAMs were enriched. (B) The bubble plot of top 10 KEGG pathways to which HcS-vs.-HS DAMs were enriched.

**Supplement Table S1.** Structures of PhGs in *C. deserticola* and *H. ammodendron*.

| Compounds         | R1               | R2               | R3 | R4 | R5     | R6  | R7  |
|-------------------|------------------|------------------|----|----|--------|-----|-----|
| Isocrenatoside    | OH               | OH               | O  | O  | Rha    | Caf | H   |
| Acteoside         | OH               | OH               | H  | H  | Rha    | Caf | H   |
| Isomartynoside    | OCH <sub>3</sub> | OH               | H  | H  | TA-Rha | H   | Fer |
| Tubuloside B      | OH               | OH               | H  | Ac | TA-Rha | H   | Caf |
| 2'-Acetylaceoside | OH               | OH               | H  | Ac | Rha    | Caf | H   |
| Salidroside       | OH               | H                | H  | H  | H      | H   | H   |
| Plantamajoside    | OH               | OH               | H  | H  | Glc    | Caf | H   |
| Plantainoside A   | OH               | OH               | H  | H  | Caf    | H   | H   |
| Echinacoside      | OH               | OH               | H  | H  | Rha    | Caf | Glc |
| Cistanoside E     | OH               | OCH <sub>3</sub> | H  | H  | Rha    | H   | H   |
| Cistanoside C     | OH               | OCH <sub>3</sub> | H  | H  | Rha    | Caf | H   |
| Cistanoside B     | OH               | OCH <sub>3</sub> | H  | H  | Rha    | Fer | Glc |
| Cistanoside A     | OH               | OCH <sub>3</sub> | H  | H  | Rha    | Caf | Glc |
| Brandioside       | OH               | OH               | H  | Ac | Rha    | Caf | Rha |
| Osmanthuside H    | OH               | H                | H  | H  | H      | H   | Api |
| Cistanoside H     | OH               | OH               | H  | Ac | Rha    | H   | H   |
| Plantainoside C   | OH               | OH               | H  | H  | Rha    | H   | Fer |
| Cistanoside D     | OH               | OCH <sub>3</sub> | H  | H  | Rha    | Fer | H   |
| Epimeridinoside A | OH               | OCH <sub>3</sub> | H  | H  | Rha    | H   | Fer |

Note: Ac, acetyl; Caf, trans-caffeoyl; Cm, trans-p-coumaroyl; Fer, trans-feruloyl; Glc,  $\beta$ -D-glucopyranose; Rha,  $\alpha$ -L-rhamnopyranose; TA-Rha, 2'', 3'', 4''-triacetyl- $\alpha$ -L-rhamnopyranose. Api, D-apiose. The general structure formula of phenylethanoid glycosides were presented below:

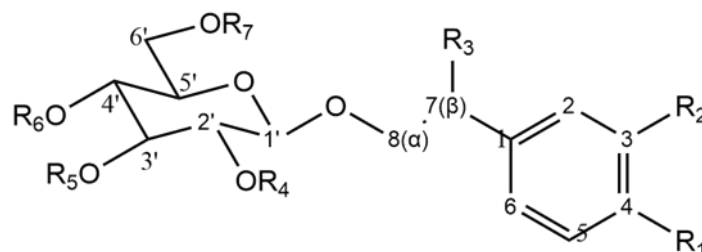**Supplement Table S2.** Information of PhGs and their precursors in *C. deserticola* and *H. ammodendron*.

| Mode               | Compound        | Formula   | MW (Da) | CAS ID      | RT (min) |
|--------------------|-----------------|-----------|---------|-------------|----------|
| Positive ion phase | Tyramine        | C8H11NO   | 137.08  | 51-67-2     | 1.2      |
|                    | Dopamine        | C8H11NO2  | 153.08  | 51-61-6     | 1.11     |
|                    | Phenylamine     | C9H11NO2  | 165.07  | 63-91-2     | 1.99     |
|                    | Tyrosine        | C9H11NO3  | 181.07  | 60-18-4     | 1.13     |
|                    | Isocrenatoside  | C29H34O15 | 622.19  | 221895-09-6 | 3.98     |
|                    | Cistanoside C   | C30H38O15 | 638.22  | 94492-22-5  | 4.15     |
|                    | Dopa            | C9H11NO4  | 197.07  | 59-92-7     | 1.15     |
|                    | Plantainoside A | C23H26O11 | 478.15  | -           | 3.38     |
| Negative ion phase | Tyrosol         | C8H10O2   | 138.07  | 501-94-0    | 3.05     |
|                    | Caffeic acid    | C9H8O4    | 180.04  | 331-39-5    | 3.14     |
|                    | Ferulic acid    | C10H10O4  | 194.06  | 537-98-4    | 4.03     |
|                    | Salidroside     | C14H20O7  | 300.12  | 10338-51-9  | 2.63     |
|                    | Cistanoside E   | C21H32O12 | 476.19  | 97400-08-3  | 3.06     |

|                    |           |        |             |      |
|--------------------|-----------|--------|-------------|------|
| Acteoside          | C29H36O15 | 624.21 | 61276-17-3  | 4.06 |
| Plantamajoside     | C29H36O16 | 640.2  | 104777-68-6 | 3.62 |
| Cistanoside D      | C31H40O15 | 652.24 | 94492-21-4  | 4.88 |
| Isomartynoside     | C31H40O15 | 652.24 | 94410-22-7  | 4.87 |
| 2'-Acetylacteoside | C31H38O16 | 666.22 | 94492-24-7  | 4.28 |
| Tubuloside B       | C31H38O16 | 666.22 | 112516-04-8 | 4.34 |
| Echinacoside       | C35H46O20 | 786.26 | 82854-37-3  | 3.31 |
| Cistanoside A      | C36H48O20 | 800.27 | 93236-42-1  | 3.58 |
| Brandioside        | C37H48O20 | 812.27 | 133393-81-4 | 3.84 |
| Cistanoside B      | C37H50O20 | 814.29 | 93236-41-0  | 3.86 |
| Osmanthuside H     | C19H28O11 | 432.16 | 149155-70-4 | 2.71 |
| Cistanoside H      | C22H32O13 | 504.18 | 104806-92-0 | 3.83 |
| Plantainoside C    | C30H38O15 | 638.22 | 136083-86-8 | 4.31 |
| Epimeridinoside A  | C31H40O15 | 652.24 | 848599-79-1 | 4.53 |
| Cistanoside D      | C31H40O15 | 652.24 | 94492-21-4  | 4.88 |

MW, molecular weight; RT, retention time.

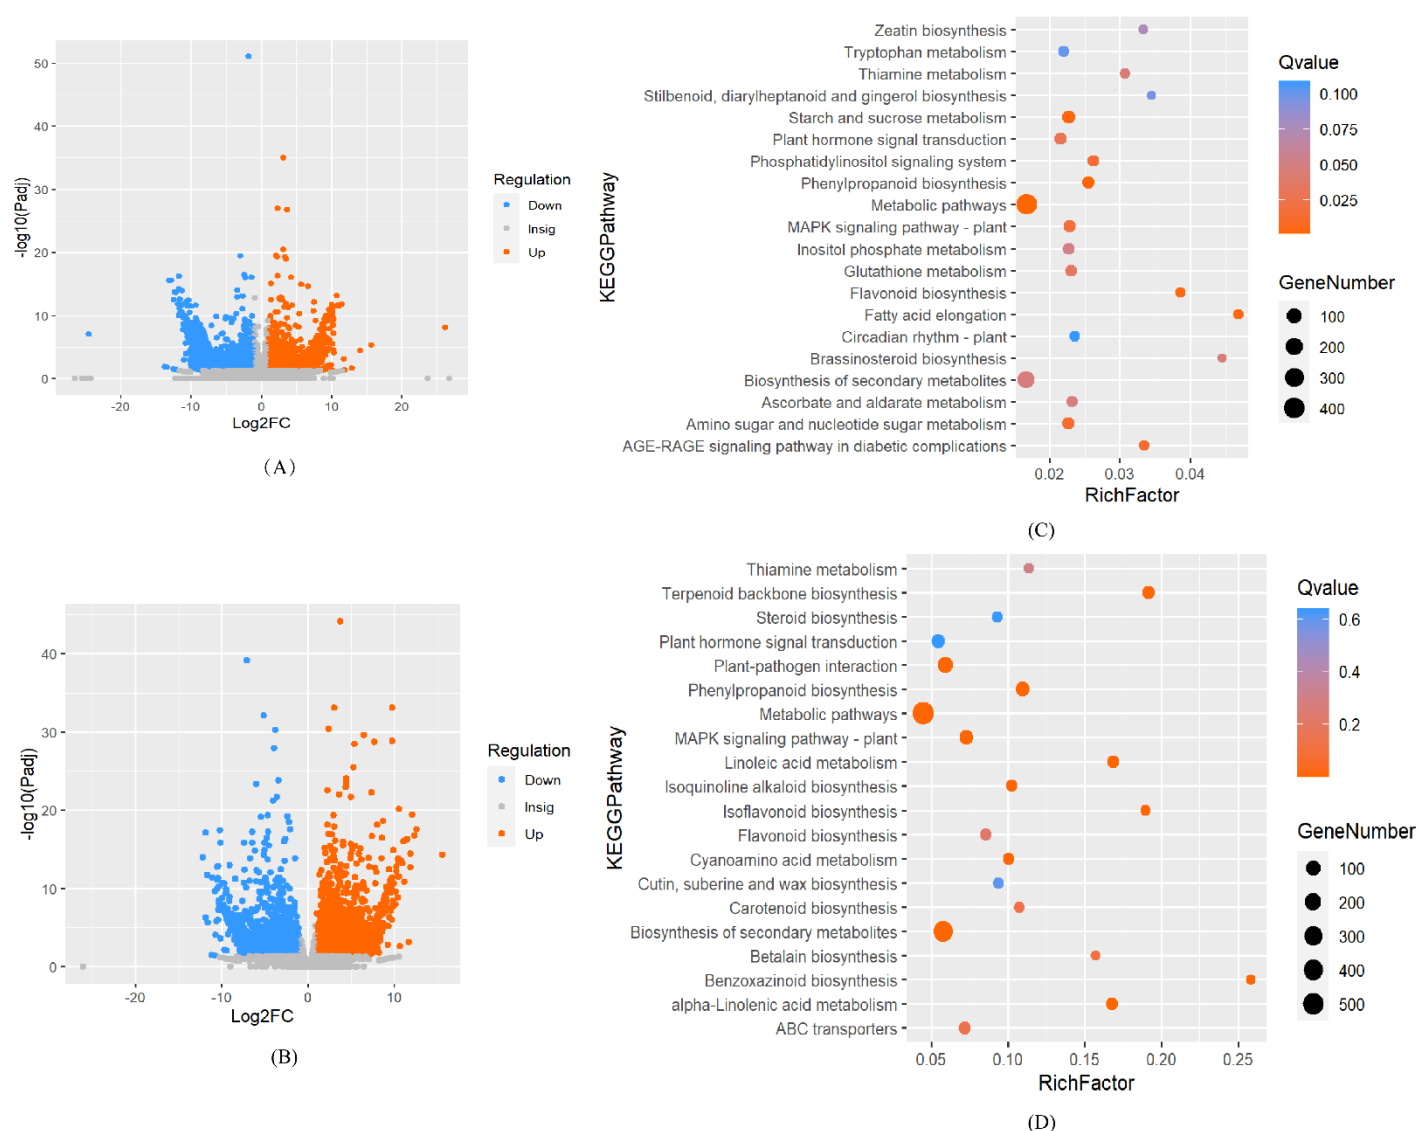

**Supplement Figure S4.** Transcriptomic changes in *H. ammodendron* roots caused by *C. deserticola* parasitism. The volcano plots visualized the filtering process of DEGs. Genes significantly downregulated (foldchange  $\leq 0.5$  and p value  $< 0.05$ ) were marked by blue color while those significantly upregulated (foldchange  $\geq 2$  and p value  $< 0.05$ ) were orange. The bubble plots showed KEGG enrichment analysis results using

DEGs. The bubble's color indicated q value and its size represented the number of DEGs enriched. (A) Volcano plot of genes expressing in HcF-vs.-HF group. (B) Volcano plot of genes expressing in HcS-vs.-HS group. (C) Bubble plot of top 20 KEGG pathways to which HcF-vs- HF DEGs were enriched. (D) Bubble plot of top 20 KEGG pathways to which HcS-vs- HS DEGs were enriched.

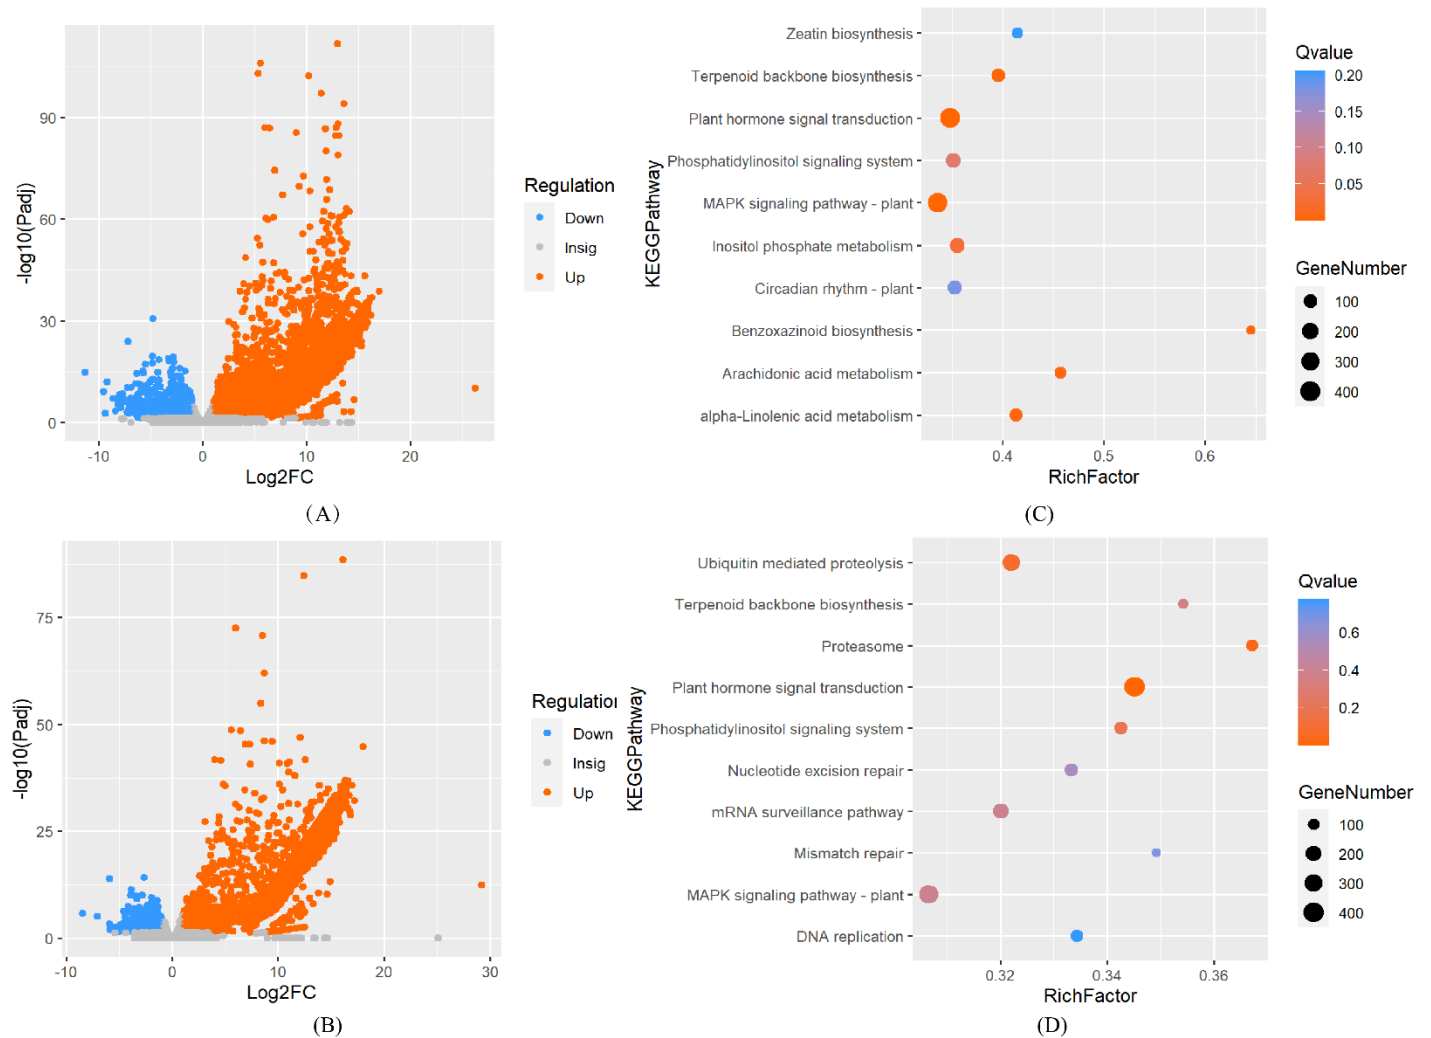

**Supplement Figure S5.** Transcriptomic changing pattern in the system composed by parasite, haustorium and host. The volcano plots visualized the filtering process of DEGs. Genes significantly downregulated (foldchange  $\leq 0.5$  and p value  $< 0.05$ ) were marked by blue color while those significantly upregulated (foldchange  $\geq 2$  and p value  $< 0.05$ ) were orange. The bubble plots showed KEGG enrichment analysis results using DEGs. The bubble's color indicated q value and its size represented the number of DEGs enriched. (A) Volcano plot of genes expressing in XS-vs.-CS group. (B) Volcano plot of genes expressing in XS-vs.-HcS group. (C) Bubble plot of top 10 KEGG pathways to which XS-vs.-CS DEGs were enriched. (D) Bubble plot of top 10 KEGG pathways to which HcS-vs.-HS DEGs were enriched.

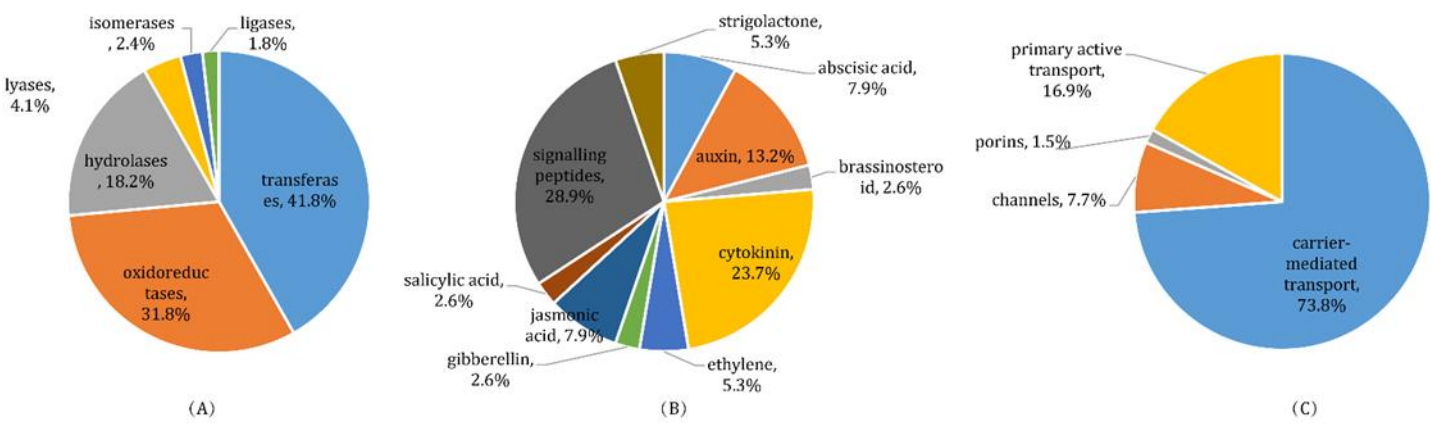

**Supplement Figure S6.** Mercator classifications of genes specifically upregulated in haustoria. Pie plots showed the percentages of genes annotated as 'enzyme classification' (A), 'phytohormone action' (B) and 'solute transport' (C).

**Supplement Table S3** *H. ammodendron* PhG-synthetic DEGs affected by *C. deserticola* parasitism.

|      | GeneID               | Log2(HcF-vs.-HF foldchange) | Log2(HcS-vs.-HS foldchange) |
|------|----------------------|-----------------------------|-----------------------------|
| TyDC | Cluster-20042.57870  | NA                          | -2.21298                    |
|      | Cluster-20042.94036  | NA                          | 2.550736                    |
| PPO  | Cluster-20042.64675  | NA                          | -3.00593                    |
|      | Cluster-20042.103369 | NA                          | -5.03364                    |
|      | Cluster-20042.60603  | NA                          | -2.31877                    |
|      | Cluster-20042.67782  | NA                          | 2.762793                    |
|      | Cluster-20042.75123  | NA                          | 4.938769                    |
|      | Cluster-20042.99065  | NA                          | 2.107622                    |
| PAO  | Cluster-20042.49695  | NA                          | 2.919835                    |
|      | Cluster-20042.69881  | NA                          | 3.163404                    |
|      | Cluster-65591.2858   | 8.146712                    | NA                          |
| UGT  | Cluster-57997.0      | 4.844912                    | NA                          |
|      | Cluster-65591.172215 | 3.762266                    | NA                          |
|      | Cluster-54039.0      | -4.15679                    | NA                          |
|      | Cluster-27477.1      | 1.859892                    | NA                          |
|      | Cluster-65591.51912  | 1.353942                    | NA                          |
|      | Cluster-65591.9408   | -4.35132                    | NA                          |
|      | Cluster-65591.165323 | 1.328536                    | NA                          |
|      | Cluster-65591.67288  | 2.910998                    | NA                          |
|      | Cluster-65591.30999  | -1.40235                    | NA                          |
|      | Cluster-43779.1      | -10.1189                    | NA                          |
|      | Cluster-20042.81537  | NA                          | 1.920222                    |
|      | Cluster-20042.61118  | NA                          | 4.462931                    |
|      | Cluster-20042.78674  | NA                          | 3.741149                    |
|      | Cluster-20042.53531  | NA                          | 2.697838                    |
|      | Cluster-20042.45312  | NA                          | -3.89453                    |
|      | Cluster-20042.100863 | NA                          | 2.590998                    |
|      | Cluster-20042.103516 | NA                          | -2.9074                     |
|      | Cluster-20042.47888  | NA                          | 2.735516                    |
|      | Cluster-20042.65342  | NA                          | 1.579276                    |
|      | Cluster-20042.89184  | NA                          | 2.678052                    |
|      | Cluster-20042.77086  | NA                          | 3.346782                    |
|      | Cluster-20042.62811  | NA                          | 4.337779                    |
|      | Cluster-20042.69314  | NA                          | 1.515049                    |
|      | Cluster-20042.80697  | NA                          | -1.27118                    |
|      | Cluster-20042.109999 | NA                          | -2.40483                    |
|      | Cluster-20042.73576  | NA                          | -1.06969                    |
|      | Cluster-20042.64699  | NA                          | 2.18706                     |
|      | Cluster-20042.32456  | NA                          | -2.2045                     |
|      | Cluster-20042.68255  | NA                          | -1.56741                    |
|      | Cluster-20042.75132  | NA                          | 1.112809                    |
|      | Cluster-20042.58380  | NA                          | -1.81437                    |
|      | Cluster-20042.103245 | NA                          | -4.73342                    |

|     |                      |          |          |
|-----|----------------------|----------|----------|
|     | Cluster-20042.54310  | NA       | 2.054335 |
|     | Cluster-20042.65282  | NA       | 1.127328 |
| CCR | Cluster-65591.127998 | -2.9585  | NA       |
|     | Cluster-65591.62351  | -1.22189 | NA       |
|     | Cluster-65591.96138  | -1.95595 | NA       |
|     | Cluster-65591.99664  | -1.11163 | NA       |
|     | Cluster-65591.92661  | -1.93125 | NA       |
|     | Cluster-65591.62349  | -1.2959  | NA       |
|     | Cluster-65591.111775 | -1.57694 | NA       |
|     | Cluster-20042.63173  | NA       | 1.12458  |
|     | Cluster-20042.91163  | NA       | -1.26916 |
|     | Cluster-20042.64779  | NA       | -1.27706 |
|     | Cluster-20042.55670  | NA       | -1.60013 |
|     | Cluster-20042.44943  | NA       | -1.62272 |
|     | Cluster-20042.114502 | NA       | -1.96643 |
|     | Cluster-20042.50091  | NA       | -2.3713  |
|     | Cluster-20042.104578 | NA       | -2.44877 |
|     | Cluster-20042.46762  | NA       | -2.89729 |
|     | Cluster-20042.117403 | NA       | -4.50519 |
|     | Cluster-20042.3913   | NA       | -4.63988 |
|     | Cluster-20042.144249 | NA       | -5.20393 |
| PAL | Cluster-20042.78395  | NA       | 3.693638 |
| 4CL | Cluster-65591.166393 | 2.160946 | NA       |
|     | Cluster-20042.90539  | NA       | -1.76306 |
|     | Cluster-20042.99594  | NA       | -1.39321 |
|     | Cluster-31032.0      | NA       | 8.764921 |
| C4H | Cluster-65591.32894  | 2.511754 | NA       |
|     | Cluster-65591.59422  | 1.326141 | NA       |
| HCT | Cluster-20042.83720  | NA       | -2.50542 |
|     | Cluster-5748.0       | NA       | 4.832237 |
|     | Cluster-20042.106479 | NA       | -2.03028 |
| C3H | Cluster-65591.81624  | 2.737275 | NA       |
|     | Cluster-20042.44994  | NA       | 3.823957 |

---

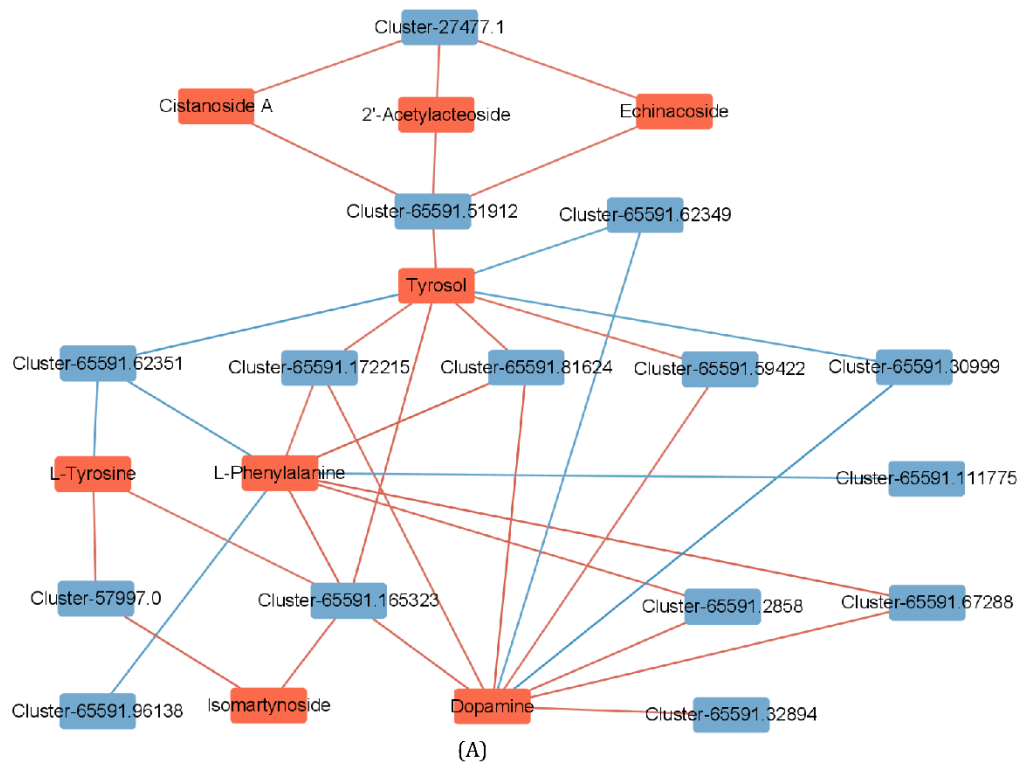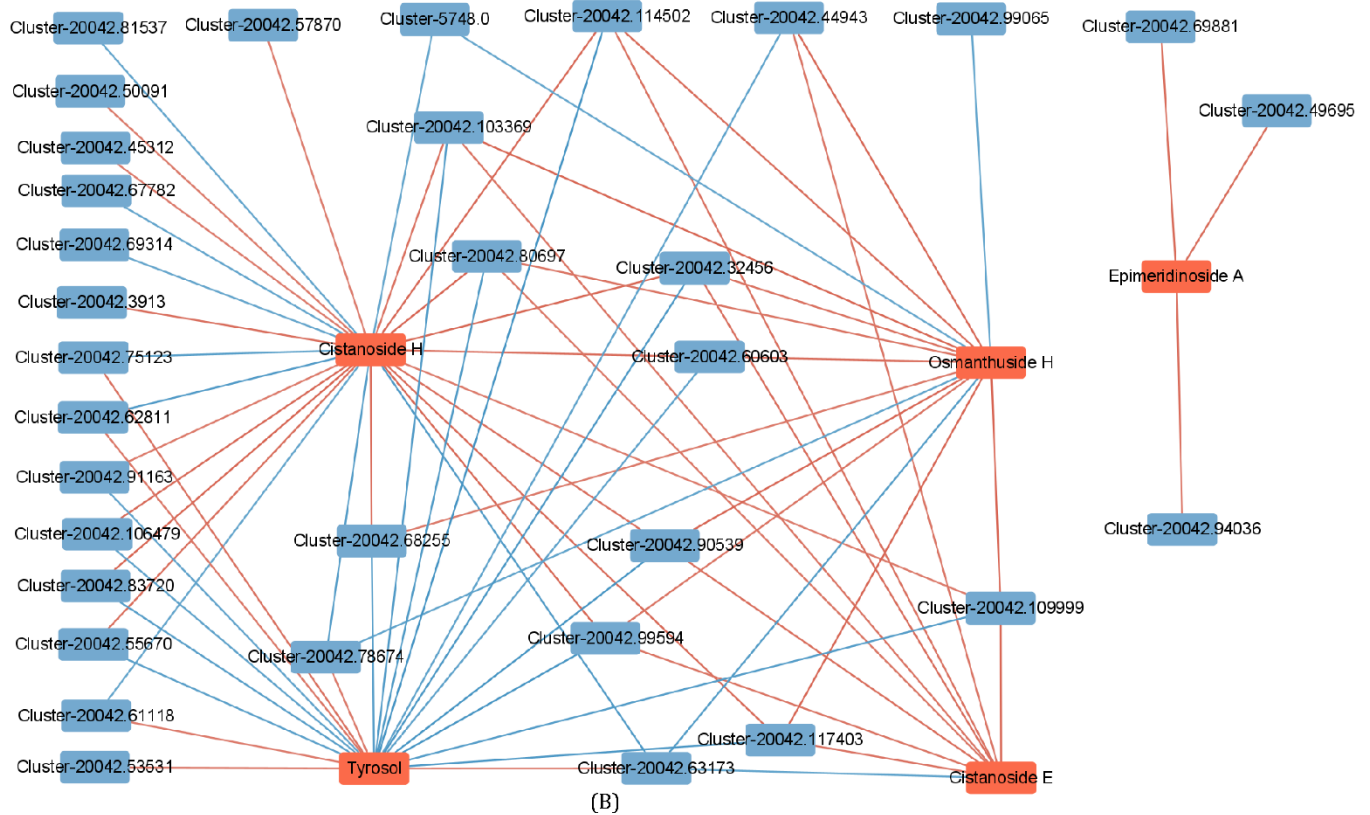

**Supplement Figure S7.** (A) Connection network between DEGs (blue grids) and DAMs (orange grids) in HcF-vs.-HF group. The blue lines indicate significant negative correlation ( $P<0.05$ , correlation coefficient  $< -0.8$ ) and the orange lines indicate significant positive correlation ( $P<0.05$ , correlation coefficient  $> 0.8$ ). (B) Connection network between DEGs (blue grids) and DAMs (orange grids) in HcS-vs.-HS group.



**Supplement Table S4** UGT candidates in *H. ammodendron*

| GeneID               | Amino acid (aa) | Family | E-value   | Identity (%) | Reference sequence ID |
|----------------------|-----------------|--------|-----------|--------------|-----------------------|
| Cluster-21066.0      | 483             | UGT92  | 1.45E-161 | 68.7         | Q9LXV0                |
| Cluster-32840.0      | 431             | UGT92  | 3.75E-110 | 59.4         | Q9LXV0                |
| Cluster-54039.0      | 476             | UGT92  | 1.51E-161 | 68.6         | Q9LXV0                |
| Cluster-65591.123403 | 356             | UGT91  | 1.35E-125 | 68.1         | Q9LTA3                |
| Cluster-65591.123404 | 465             | UGT91  | 3.99E-168 | 68.3         | Q9LTA3                |
| Cluster-65591.148827 | 443             | UGT91  | 3.911E-83 | 51.9         | Q9LTA3                |
| Cluster-65591.159755 | 316             | UGT91  | 3.194E-75 | 58.3         | Q9LTA3                |
| Cluster-65591.25693  | 391             | UGT91  | 2.224E-90 | 56.5         | Q9LTA3                |
| Cluster-65591.75774  | 396             | UGT91  | 6.073E-95 | 56.1         | Q9LTA3                |
| Cluster-65591.83451  | 316             | UGT91  | 3.194E-75 | 58.3         | Q9LTA3                |
| Cluster-65591.83452  | 396             | UGT91  | 6.073E-95 | 56.1         | Q9LTA3                |
| Cluster-65591.88153  | 396             | UGT91  | 6.073E-95 | 56.1         | Q9LTA3                |
| Cluster-17228.0      | 451             | UGT91  | 8.81E-136 | 63.5         | Q940V3                |
| Cluster-22345.0      | 453             | UGT91  | 1.31E-133 | 63.8         | Q940V3                |
| Cluster-6556.0       | 453             | UGT91  | 2.77E-134 | 64.2         | Q940V3                |
| Cluster-65591.105290 | 465             | UGT91  | 2.02E-145 | 65.5         | Q940V3                |
| Cluster-65591.113604 | 465             | UGT91  | 2.02E-145 | 65.5         | Q940V3                |
| Cluster-65591.53756  | 465             | UGT91  | 2.02E-145 | 65.5         | Q940V3                |
| Cluster-65591.25486  | 455             | UGT90  | 6.86E-157 | 68.4         | Q9ZVX4                |
| Cluster-65591.7404   | 455             | UGT90  | 6.86E-157 | 68.4         | Q9ZVX4                |
| Cluster-44383.0      | 462             | UGT89  | 6.08E-166 | 70.1         | Q6VAA5                |
| Cluster-44383.1      | 462             | UGT89  | 6.08E-166 | 70.1         | Q6VAA5                |
| Cluster-65591.111737 | 386             | UGT89  | 5.01E-130 | 68.1         | Q9LZD8                |
| Cluster-65591.16868  | 458             | UGT89  | 2.63E-141 | 65.4         | Q9LZD8                |
| Cluster-65591.31200  | 473             | UGT89  | 2.63E-154 | 67.2         | Q9LZD8                |
| Cluster-26255.1      | 394             | UGT88  | 1.123E-47 | 48.0         | Q6VAA7                |
| Cluster-65591.80923  | 505             | UGT88  | 5.78E-151 | 66.7         | Q6VAA7                |
| Cluster-65591.28176  | 308             | UGT86  | 5.59E-101 | 68.3         | Q9ZUV0                |
| Cluster-29865.0      | 304             | UGT86  | 7.05E-110 | 72.2         | Q9SJL0                |
| Cluster-47176.0      | 304             | UGT86  | 2.14E-110 | 71.9         | Q9SJL0                |
| Cluster-52305.0      | 474             | UGT86  | 4.67E-144 | 63.9         | Q9SJL0                |
| Cluster-65591.124228 | 488             | UGT86  | 2.59E-179 | 70.1         | Q9SJL0                |
| Cluster-65591.134475 | 491             | UGT86  | 1.93E-179 | 70.3         | Q9SJL0                |
| Cluster-65591.90511  | 484             | UGT86  | 1.78E-178 | 70.7         | Q9SJL0                |
| Cluster-65591.90512  | 339             | UGT86  | 4.26E-131 | 72.6         | Q9SJL0                |
| Cluster-65591.9406   | 484             | UGT86  | 7.34E-179 | 70.9         | Q9SJL0                |
| Cluster-65591.9407   | 485             | UGT86  | 6.83E-179 | 71.0         | Q9SJL0                |
| Cluster-65591.9408   | 487             | UGT86  | 5.65E-179 | 71.2         | Q9SJL0                |
| Cluster-65591.79144  | 321             | UGT85  | 4E-120    | 70.5         | Q6VAB3                |
| Cluster-65591.95218  | 321             | UGT85  | 4E-120    | 70.5         | Q6VAB3                |
| Cluster-65591.160000 | 489             | UGT85  | 0         | 71.8         | Q9ZWJ3                |
| Cluster-65591.14139  | 451             | UGT83  | 1.77E-100 | 54.9         | Q9SGA8                |
| Cluster-65591.105881 | 311             | UGT79  | 1.52E-104 | 69.4         | Q9T080                |
| Cluster-65591.105884 | 344             | UGT79  | 2.4E-108  | 64.5         | Q9T080                |
| Cluster-65591.111516 | 431             | UGT79  | 4.45E-141 | 64.7         | Q9T080                |

|                      |     |       |           |      |            |
|----------------------|-----|-------|-----------|------|------------|
| Cluster-65591.137048 | 306 | UGT79 | 5.85E-105 | 69.8 | Q9T080     |
| Cluster-65591.162455 | 340 | UGT79 | 9.3E-109  | 65.0 | Q9T080     |
| Cluster-65591.105885 | 420 | UGT79 | 1.8E-133  | 62.5 | Q9XIQ4     |
| Cluster-65591.105886 | 420 | UGT79 | 1.8E-133  | 62.5 | Q9XIQ4     |
| Cluster-65591.105889 | 420 | UGT79 | 1.8E-133  | 62.5 | Q9XIQ4     |
| Cluster-65591.105895 | 420 | UGT79 | 1.8E-133  | 62.5 | Q9XIQ4     |
| Cluster-65591.15682  | 320 | UGT76 | 8.626E-96 | 64.2 | Q9C768     |
| Cluster-65591.15686  | 314 | UGT76 | 4.1E-88   | 62.7 | Q9C768     |
| Cluster-65591.162327 | 455 | UGT74 | 5.52E-173 | 69.5 | O22822     |
| Cluster-65591.68313  | 359 | UGT74 | 1.8E-128  | 69.3 | O22822     |
| Cluster-65591.69728  | 309 | UGT74 | 1.262E-94 | 63.4 | Q9SYK9     |
| Cluster-65591.82796  | 464 | UGT74 | 1.678E-52 | 48.9 | Q9SKC5     |
| Cluster-65591.67648  | 450 | UGT74 | 6.25E-138 | 64.9 | O48676     |
| Cluster-65591.67649  | 450 | UGT74 | 6.25E-138 | 64.9 | O48676     |
| Cluster-65591.28465  | 496 | UGT73 | 0         | 76.0 | Q9SCP6     |
| Cluster-65591.74129  | 380 | UGT73 | 3.635E-38 | 45.9 | A0A2R4LMF9 |
| Cluster-65591.83204  | 370 | UGT73 | 4.601E-38 | 47.1 | A0A2R4LMF9 |
| Cluster-27477.1      | 474 | UGT73 | 6.2E-142  | 62.8 | Q9ZQG4     |
| Cluster-45552.0      | 494 | UGT73 | 2.23E-112 | 57.3 | Q9ZQG4     |
| Cluster-65591.115428 | 302 | UGT73 | 5.805E-52 | 57.6 | Q9ZQG4     |
| Cluster-45498.0      | 489 | UGT73 | 1.13E-115 | 58.1 | Q7Y232     |
| Cluster-65591.84717  | 352 | UGT73 | 5.023E-54 | 60.7 | Q7Y232     |
| Cluster-27477.0      | 472 | UGT73 | 1.52E-134 | 62.9 | Q8W491     |
| Cluster-37808.0      | 364 | UGT73 | 3.24E-111 | 63.6 | Q8W491     |
| Cluster-65591.134604 | 415 | UGT73 | 1.59E-115 | 62.2 | Q8W491     |
| Cluster-65591.142099 | 371 | UGT73 | 1.31E-142 | 71.5 | Q8W491     |
| Cluster-65591.32140  | 324 | UGT73 | 3.17E-123 | 71.6 | Q8W491     |
| Cluster-65591.84640  | 408 | UGT73 | 1.89E-166 | 73.9 | Q8W491     |
| Cluster-65591.81750  | 386 | UGT72 | 1.25E-145 | 70.3 | Q9LNI1     |
| Cluster-65591.90680  | 386 | UGT72 | 1.25E-145 | 70.3 | Q9LNI1     |
| Cluster-65591.104312 | 467 | UGT72 | 4.04E-171 | 68.0 | Q9M156     |
| Cluster-65591.123589 | 366 | UGT72 | 3.36E-123 | 68.0 | Q9M156     |
| Cluster-65591.123590 | 367 | UGT72 | 2.21E-123 | 68.0 | Q9M156     |
| Cluster-65591.123591 | 361 | UGT72 | 9.11E-145 | 73.3 | Q9M156     |
| Cluster-65591.132635 | 366 | UGT72 | 8.73E-124 | 68.3 | Q9M156     |
| Cluster-65591.67590  | 368 | UGT72 | 1.63E-123 | 67.8 | Q9M156     |
| Cluster-65591.87505  | 472 | UGT72 | 0         | 73.8 | Q9M156     |
| Cluster-65591.92058  | 472 | UGT72 | 0         | 73.8 | Q9M156     |
| Cluster-65591.97292  | 367 | UGT72 | 6.75E-123 | 67.6 | Q9M156     |
| Cluster-65591.23010  | 320 | UGT71 | 1.634E-70 | 57.9 | Q6VAB2     |
| Cluster-65591.24510  | 328 | UGT71 | 3.225E-85 | 61.4 | Q6VAB2     |
| Cluster-65591.65784  | 477 | UGT71 | 2.33E-151 | 65.1 | Q6VAB2     |
| Cluster-65591.84842  | 324 | UGT71 | 6.987E-72 | 58.5 | Q6VAB2     |
| Cluster-65591.93286  | 484 | UGT71 | 1.87E-142 | 65.6 | Q6VAB2     |
| Cluster-65591.153685 | 495 | UGT71 | 9.34E-153 | 64.9 | D3UAG1     |
| Cluster-65591.132161 | 487 | UGT71 | 2.39E-151 | 64.7 | D3THI6     |
| Cluster-65591.137447 | 415 | UGT71 | 3.73E-138 | 67.7 | D3THI6     |
| Cluster-65591.34619  | 450 | UGT71 | 1.32E-117 | 60.3 | D3THI6     |

|                      |     |        |           |      |            |
|----------------------|-----|--------|-----------|------|------------|
| Cluster-65591.126569 | 463 | UGT88  | 9.964E-56 | 50.0 | A0A067YB04 |
| Cluster-43779.1      | 570 | UGT80  | 2.22E-134 | 60.8 | Q9XIG1     |
| Cluster-65591.103241 | 497 | UGT80  | 0         | 87.8 | Q9M8Z7     |
| Cluster-65591.103242 | 324 | UGT80  | 0         | 89.3 | Q9M8Z7     |
| Cluster-65591.74649  | 588 | UGT80  | 0         | 82.8 | Q9M8Z7     |
| Cluster-65591.92668  | 556 | UGT80  | 0         | 87.7 | Q9M8Z7     |
| Cluster-65591.92669  | 497 | UGT80  | 0         | 88.0 | Q9M8Z7     |
| Cluster-65591.53969  | 497 | UGT75  | 4.49E-145 | 64.6 | A7MAS5     |
| Cluster-65591.67288  | 497 | UGT75  | 3.28E-146 | 64.8 | A7MAS5     |
| Cluster-54362.0      | 449 | UGT74  | 1.18E-149 | 67.4 | K7NBW3     |
| Cluster-65591.142893 | 467 | UGT74  | 3.46E-119 | 60.3 | K7NBW3     |
| Cluster-65591.142894 | 467 | UGT74  | 3.46E-119 | 60.3 | K7NBW3     |
| Cluster-65591.66190  | 458 | UGT74  | 2.71E-152 | 67.6 | K7NBW3     |
| Cluster-65591.71660  | 449 | UGT74  | 6.06E-149 | 67.4 | K7NBW3     |
| Cluster-65591.79512  | 458 | UGT74  | 1.18E-152 | 67.6 | K7NBW3     |
| Cluster-65591.86205  | 458 | UGT74  | 1.22E-152 | 67.6 | K7NBW3     |
| Cluster-62357.0      | 311 | UGT85  | 1.9E-116  | 70.6 | G3FIN8     |
| Cluster-65591.87593  | 502 | UGT84  | 0         | 78.8 | A0A193AUF6 |
| Cluster-57997.0      | 477 | UGT85  | 0         | 75.5 | F8WKW1     |
| Cluster-65591.149863 | 382 | UGT85  | 3.58E-157 | 74.7 | F8WKW1     |
| Cluster-65591.149864 | 407 | UGT85  | 5.46E-176 | 76.0 | F8WKW1     |
| Cluster-65591.167954 | 470 | UGT85  | 0         | 70.8 | F8WKW1     |
| Cluster-65591.19046  | 479 | UGT85  | 0         | 70.0 | F8WKW1     |
| Cluster-65591.2858   | 477 | UGT85  | 0         | 75.5 | F8WKW1     |
| Cluster-65591.80733  | 312 | UGT85  | 4.37E-143 | 77.4 | F8WKW1     |
| Cluster-65591.81499  | 479 | UGT85  | 0         | 70.4 | F8WKW1     |
| Cluster-65591.92026  | 312 | UGT85  | 4.37E-143 | 77.4 | F8WKW1     |
| Cluster-65591.94515  | 490 | UGT85  | 0         | 71.6 | F8WKW1     |
| Cluster-65591.170819 | 315 | UGT709 | 4.24E-123 | 73.3 | U3U992     |
| Cluster-65591.170820 | 456 | UGT709 | 2.88E-152 | 67.9 | U3U992     |
| Cluster-65591.171180 | 469 | UGT709 | 5.5E-150  | 66.2 | U3U992     |
| Cluster-24476.0      | 431 | UGT85  | 0         | 74.7 | B2XBQ5     |
| Cluster-9773.0       | 450 | UGT78  | 8.43E-140 | 64.2 | Q9LFJ8     |
| Cluster-69206.3      | 312 | UGT80  | 1.88E-154 | 81.6 | Q9XIG1     |
| Cluster-69206.7      | 335 | UGT80  | 4.35E-177 | 83.7 | Q9XIG1     |
| Cluster-69206.8      | 398 | UGT80  | 0         | 81.6 | Q9XIG1     |
| Cluster-10683.0      | 510 | UGT80  | 1.19E-136 | 64.8 | Q9M8Z7     |
| Cluster-10684.0      | 494 | UGT80  | 1.75E-136 | 64.8 | Q9M8Z7     |
| Cluster-24999.0      | 540 | UGT80  | 2.32E-134 | 64.1 | Q9M8Z7     |
| Cluster-24999.1      | 585 | UGT80  | 2.22E-134 | 64.1 | Q9M8Z7     |
| Cluster-24999.2      | 585 | UGT80  | 2.22E-134 | 64.1 | Q9M8Z7     |

**Supplement Table S5.** UGT candidates in *C. deserticola*.

| GeneID               | Amino acid (aa) | Family | E-value    | Identity (%) | Reference sequence ID |
|----------------------|-----------------|--------|------------|--------------|-----------------------|
| Cluster-10691.114607 | 364             | UGT90  | 7.1E-116   | 65.2         | Q9ZVX4                |
| Cluster-10691.117489 | 363             | UGT90  | 4.779E-112 | 64.1         | Q9ZVX4                |
| Cluster-10691.146973 | 364             | UGT90  | 8.265E-116 | 65.2         | Q9ZVX4                |
| Cluster-10691.210013 | 397             | UGT90  | 2.162E-117 | 64.6         | Q9ZVX4                |

|                      |     |       |            |      |            |
|----------------------|-----|-------|------------|------|------------|
| Cluster-10691.39306  | 408 | UGT90 | 9.395E-124 | 64.9 | Q9ZVX4     |
| Cluster-10691.39309  | 467 | UGT90 | 1.933E-136 | 64.7 | Q9ZVX4     |
| Cluster-10691.110679 | 472 | UGT89 | 9.017E-179 | 73.2 | Q6VAA5     |
| Cluster-10691.118503 | 475 | UGT89 | 1.796E-180 | 73.2 | Q6VAA5     |
| Cluster-10691.121191 | 472 | UGT89 | 9.017E-179 | 73.2 | Q6VAA5     |
| Cluster-10691.46129  | 439 | UGT89 | 5.253E-169 | 71.3 | Q9LZD8     |
| Cluster-5739.0       | 470 | UGT89 | 1.899E-162 | 68.7 | Q9LZD8     |
| Cluster-10691.139803 | 474 | UGT88 | 1.011E-162 | 68.1 | D3UAG7     |
| Cluster-10691.131097 | 472 | UGT88 | 9.781E-163 | 69.0 | Q6VAA7     |
| Cluster-10691.131098 | 472 | UGT88 | 9.781E-163 | 69.0 | Q6VAA7     |
| Cluster-10691.185902 | 458 | UGT88 | 4.814E-161 | 67.9 | Q6VAA7     |
| Cluster-10691.112663 | 458 | UGT87 | 1.599E-160 | 70.0 | O64732     |
| Cluster-10691.121503 | 456 | UGT87 | 1.567E-159 | 69.9 | O64732     |
| Cluster-10691.196067 | 314 | UGT87 | 9.7074E-82 | 62.6 | O64732     |
| Cluster-10691.201967 | 314 | UGT87 | 9.7074E-82 | 62.6 | O64732     |
| Cluster-10691.119149 | 453 | UGT86 | 1.279E-164 | 69.7 | Q9S JL0    |
| Cluster-10691.151473 | 315 | UGT86 | 4.223E-108 | 69.9 | Q9S JL0    |
| Cluster-10691.33814  | 354 | UGT86 | 4.381E-122 | 69.3 | Q9S JL0    |
| Cluster-10691.74493  | 378 | UGT86 | 7.369E-117 | 65.2 | Q9S JL0    |
| Cluster-10691.91766  | 315 | UGT86 | 4.223E-108 | 69.9 | Q9S JL0    |
| Cluster-26714.0      | 407 | UGT86 | 2.982E-111 | 60.6 | Q9S JL0    |
| Cluster-10691.146136 | 323 | UGT85 | 1.162E-162 | 80.6 | Q6VAB3     |
| Cluster-10691.146137 | 347 | UGT85 | 9.983E-179 | 80.8 | Q6VAB3     |
| Cluster-10691.162683 | 485 | UGT85 | 0          | 73.0 | Q9SK82     |
| Cluster-10691.142628 | 307 | UGT84 | 5.4862E-16 | 44.9 | Q5XF20     |
| Cluster-10691.164268 | 451 | UGT79 | 5.433E-147 | 63.6 | I1KEV6     |
| Cluster-10691.164269 | 414 | UGT79 | 5.257E-135 | 63.8 | I1KEV6     |
| Cluster-10691.205645 | 449 | UGT79 | 1.594E-145 | 63.5 | I1KEV6     |
| Cluster-10691.225522 | 451 | UGT79 | 2.237E-146 | 63.6 | I1KEV6     |
| Cluster-10691.225523 | 416 | UGT79 | 1.205E-135 | 63.7 | I1KEV6     |
| Cluster-10691.123433 | 456 | UGT79 | 2.277E-180 | 71.4 | Q9T081     |
| Cluster-10691.147537 | 457 | UGT76 | 8.342E-165 | 69.0 | Q9M052     |
| Cluster-10691.188735 | 448 | UGT76 | 8.387E-163 | 69.4 | Q9M052     |
| Cluster-10691.34936  | 456 | UGT76 | 9.556E-164 | 69.5 | Q9M052     |
| Cluster-10691.121101 | 428 | UGT74 | 3.734E-132 | 64.1 | Q6VAA6     |
| Cluster-13596.0      | 428 | UGT74 | 3.734E-132 | 64.1 | Q6VAA6     |
| Cluster-10691.93238  | 467 | UGT74 | 0          | 72.5 | O22822     |
| Cluster-10691.217659 | 307 | UGT74 | 8.3607E-16 | 41.6 | Q9SKC5     |
| Cluster-10691.206681 | 338 | UGT73 | 8.634E-145 | 75.6 | Q9SCP6     |
| Cluster-13956.0      | 370 | UGT73 | 8.2756E-42 | 57.6 | A0A2R4LMF9 |
| Cluster-10691.99921  | 483 | UGT73 | 6.414E-175 | 71.5 | K4GGT4     |
| Cluster-10691.130076 | 479 | UGT73 | 1.085E-133 | 62.1 | Q9ZQG4     |
| Cluster-10691.166032 | 415 | UGT73 | 1.3599E-51 | 60.4 | Q7Y232     |
| Cluster-13955.0      | 444 | UGT73 | 1.0506E-54 | 59.7 | Q7Y232     |
| Cluster-10691.116093 | 479 | UGT73 | 8.349E-133 | 61.6 | Q8W491     |
| Cluster-10691.93081  | 469 | UGT72 | 0          | 76.1 | Q9M156     |
| Cluster-10691.127683 | 471 | UGT71 | 3.312E-164 | 68.6 | Q6VAB2     |
| Cluster-10691.201491 | 332 | UGT71 | 1.1949E-86 | 62.0 | D3THI6     |

|                      |     |        |            |      |            |
|----------------------|-----|--------|------------|------|------------|
| Cluster-10691.79338  | 355 | UGT708 | 3.6533E-80 | 60.3 | A0A0A1HA03 |
| Cluster-12940.0      | 414 | UGT708 | 1.7E-111   | 62.9 | A0A0A1HA03 |
| Cluster-10691.102394 | 314 | UGT80  | 0          | 86.8 | Q9XIG1     |
| Cluster-10691.50439  | 559 | UGT80  | 0          | 82.7 | Q9XIG1     |
| Cluster-10691.51186  | 451 | UGT74  | 2.526E-147 | 67.4 | K7NBW3     |
| Cluster-18386.0      | 369 | UGT74  | 1.9366E-76 | 59.7 | K7NBW3     |
| Cluster-32153.0      | 453 | UGT74  | 1.01E-152  | 66.7 | K7NBW3     |
| Cluster-32154.0      | 452 | UGT74  | 5.641E-148 | 66.8 | K7NBW3     |
| Cluster-9689.1       | 408 | UGT74  | 1.2371E-98 | 62.1 | K7NBW3     |
| Cluster-9689.2       | 408 | UGT74  | 1.0039E-94 | 60.5 | K7NBW3     |
| Cluster-9689.4       | 405 | UGT74  | 1.4901E-96 | 60.6 | K7NBW3     |
| Cluster-13980.0      | 439 | UGT78  | 1.889E-156 | 66.0 | Q9LFJ8     |
| Cluster-10691.108718 | 472 | UGT85  | 0          | 78.4 | F8WKW1     |
| Cluster-10691.119776 | 310 | UGT85  | 1.349E-136 | 75.7 | F8WKW1     |
| Cluster-10691.73743  | 468 | UGT85  | 0          | 82.8 | F8WKW1     |
| Cluster-10691.123734 | 310 | UGT709 | 3.381E-125 | 73.0 | U3U992     |
| Cluster-10691.45154  | 319 | UGT709 | 6.526E-149 | 81.6 | U3U992     |
| Cluster-10691.55310  | 483 | UGT709 | 9.422E-176 | 70.0 | U3U992     |
| Cluster-10691.82758  | 420 | UGT709 | 2.415E-162 | 70.8 | U3U992     |
| Cluster-10691.98625  | 495 | UGT709 | 0          | 77.0 | U5NH37     |
| Cluster-10691.162684 | 309 | UGT85  | 2.327E-127 | 75.3 | B2XBQ5     |
| Cluster-32849.0      | 309 | UGT85  | 2.327E-127 | 75.3 | B2XBQ5     |

**Supplement Table S6.** qRT-PCR primer name and sequences.

|                       | Gene ID             | Sequence (5'-3')                                    |
|-----------------------|---------------------|-----------------------------------------------------|
| <i>H. ammodendron</i> | Cluster-20042.94036 | GCCACTATCGGGACAACCTC<br>AGGAACCATTTGTGGGCATTC       |
|                       | Cluster-20042.67782 | GGTGGTATCTCTACTTCTTTGAGAG<br>TCCCAATTCCAGTAGGGCAC   |
|                       | Cluster-5748.0      | CCACAAGCAAGACAACTTCCA<br>ATCCCCATCTGGCTTTTTCGT      |
|                       | Cluster-20042.44994 | GTTTGGGCGATAGGTCGTGA<br>CGATGCAAACCCGTCTACCT        |
|                       | Cluster-31032.0     | GCGCAGTTTGAAGCAGTTT<br>ACGAGTTCCTACTGCTGTTGA        |
|                       | Internal reference  | CAACTGGCTTCAAATGTGGTATCA<br>ATCTTCACGGGCTTCAGAAAATC |
|                       |                     |                                                     |
| <i>C. deserticola</i> | Cluster-20042.72273 | CCAGAGCACTTCGTATGGGA<br>GGTAGCAAGAAGCATGACGG        |
|                       | Cluster-20042.72232 | GGATCGAGTTATCGGGCAGG<br>GGGGCAACATAAGAGGGGTT        |
|                       | Cluster-20042.72233 | ATGGAACCCGACTTTCTCCC<br>AGAAATCCACCTCTCGGGCT        |
|                       | Cluster-20042.72797 | TTGGCTTTCGCCACTAACCT<br>GCGCCAACCCCTATCCAATA        |
|                       | Cluster-20042.70944 | GCCGACTACAACGAGGGATT<br>CGGGTAGAAAAGCCCGAAGT        |
|                       | Internal reference  | TGTTGCTGGAGTGTGTTGAGC                               |
|                       |                     |                                                     |

AACCAAGGACTTGCGAACAG

---
